# Supplementary material for: Dynamic granular hydrogels to assess pancreatic cancer cell fate
Source: Royal Society of Chemistry journal article supplement (doi:10.1039/d5bm00997a), 2026-01-01
Supplement: d5bm00997a1.pdf [file d5bm00997a1.pdf]

## **Dynamic granular hydrogels to assess pancreatic cancer cell fate**

Ellen Frahm,<sup>1</sup> Chien-Chi Lin<sup>1,2\*</sup>

<sup>1</sup>Weldon School of Biomedical Engineering, Purdue University, West Lafayette, IN, USA

<sup>2</sup>Indiana University Simon Comprehensive Cancer Center, Indianapolis, IN, USA

### *Supporting information*

\*To whom correspondence should be sent:

Chien-Chi Lin, Ph.D.  
Professor  
Weldon School of Biomedical Engineering  
Purdue University  
206 Martin Jischke Dr. West Lafayette, IN, 47907

Contact Information:  
Phone: (765) 495-7791  
Emails: [lin711@purdue.edu](mailto:lin711@purdue.edu)

**Table S1.** The PDI of microgels sampled from formation at increasing oil phase flow rates. (PDI values calculated from diameters of microgels at: 30  $\mu\text{L}/\text{min}$ : n = 50, 40  $\mu\text{L}/\text{min}$ : n = 69, 50  $\mu\text{L}/\text{min}$ : n = 72, 60  $\mu\text{L}/\text{min}$ : n = 73.)

| Oil Flow Rate ( $\mu\text{L}/\text{min}$ ) | PDI      |
|--------------------------------------------|----------|
| 30                                         | 0.044098 |
| 40                                         | 0.012498 |
| 50                                         | 0.006171 |
| 60                                         | 0.002315 |

**Table S2.** The PDI of microgels sampled from formations at increasing throughput conditions. (PDI values calculated from diameters of microgels at: 14  $\mu\text{L}/\text{min}$ : n = 133, 16  $\mu\text{L}/\text{min}$ : n = 138, 18  $\mu\text{L}/\text{min}$ : n = 139, 20  $\mu\text{L}/\text{min}$ : n = 154, 30  $\mu\text{L}/\text{min}$ : n = 168, 40  $\mu\text{L}/\text{min}$ : n = 162.)

| Aqueous Flow Rate ( $\mu\text{L}/\text{min}$ ) | PDI      |
|------------------------------------------------|----------|
| 14                                             | 0.002089 |
| 16                                             | 0.001799 |
| 18                                             | 0.002198 |
| 20                                             | 0.003508 |
| 30                                             | 0.004432 |
| 40                                             | 0.007021 |

**Table S3.** The PDI of microgels sampled from dynamic stiffening via oDex incubation. (PDI values calculated from diameters of microgels at: 0%: n = 45, 0.0125%: n = 49, 0.025%: n = 74, 0.05%: n = 67, 0.1%: n = 147.)

| [oDex] (wt%) | PDI      |
|--------------|----------|
| 0            | 0.008725 |
| 0.0125       | 0.010577 |
| 0.025        | 0.011526 |
| 0.05         | 0.007756 |
| 0.1          | 0.017767 |

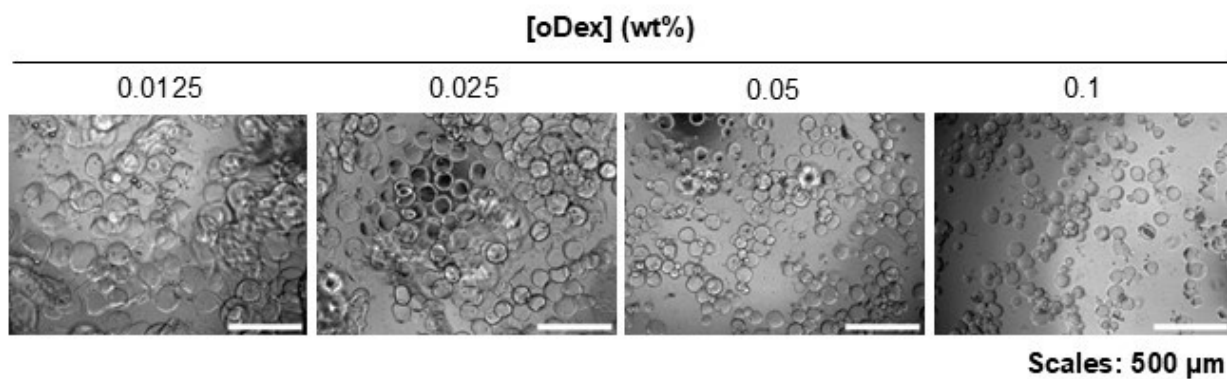

**Figure S1. Representative images of oDex-stiffened microgels.** Increasing concentration of oDex by wt.% decreases the diameter of microgels. Quantification shown in **Figure 4D**.

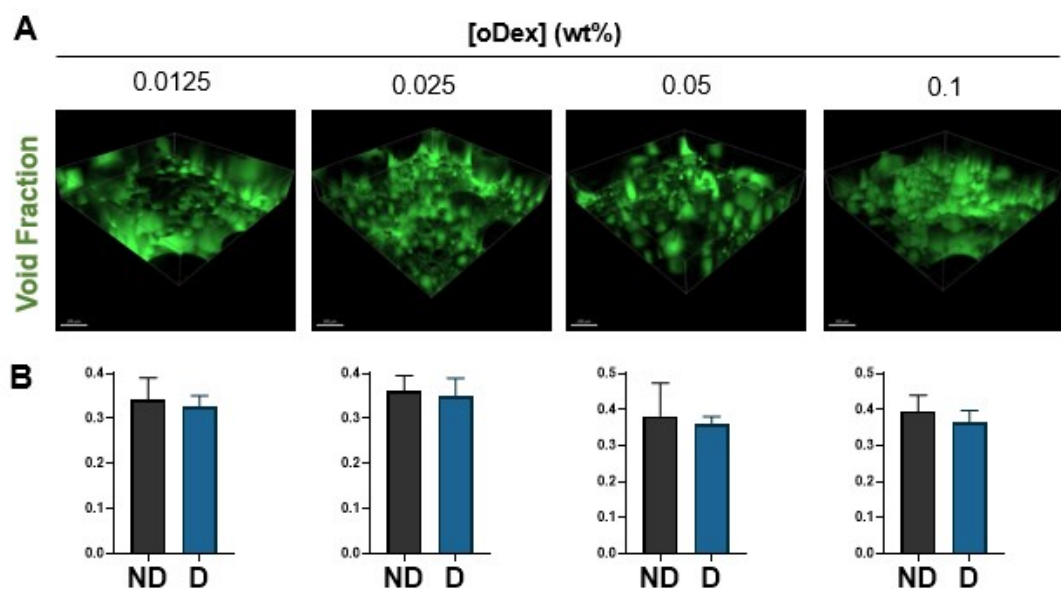

**Figure S2. Comparison of void fraction between scaffold formation processes.** (A) Photographs of void fraction for granular hydrogel scaffolds formed with pre-stiffened microgels. (B) Quantification of void fraction between non-dynamic (ND), and dynamic (D) granular hydrogel scaffolds. No significance was reported from any comparison group.

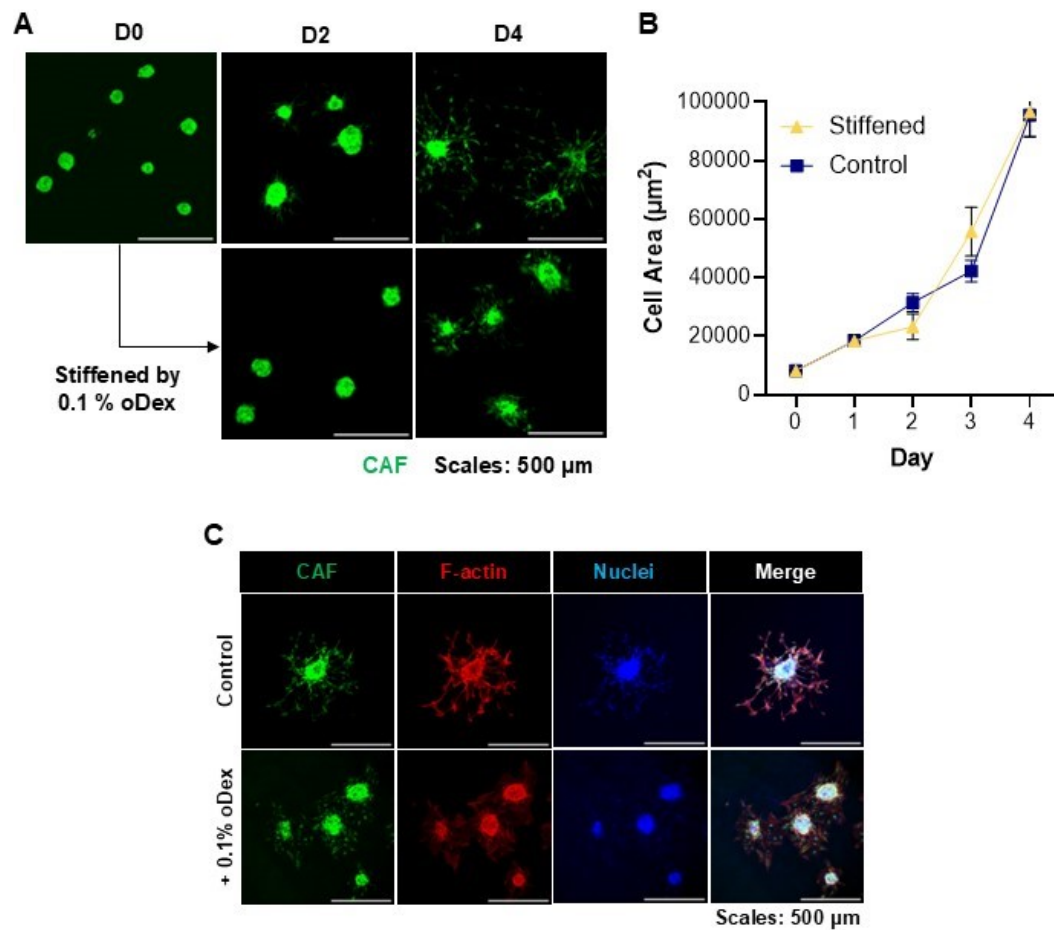

**Figure S3. CAF spheroid culture on 2D hydrogels.** (A) Representative images of CAF spheroids seeded on soft or stiffened bulk hydrogels. (B) Maximum-intensity projection area measurements of CAF spheroids over four days of culture ( $n > 30$  spheroids per timepoint per condition). (C) Representative images of F-actin/nuclei immunostaining of CAF spheroids fixed on culture day 4.
